# Supplementary figures and images for: Smart Farming Enhances Bioactive Compounds Content of Panax ginseng on Moderating Scopolamine-Induced Memory Deficits and Neuroinflammation
Source: MDPI journal article supplement (doi:10.3390/plants12030640), 2023-02-01

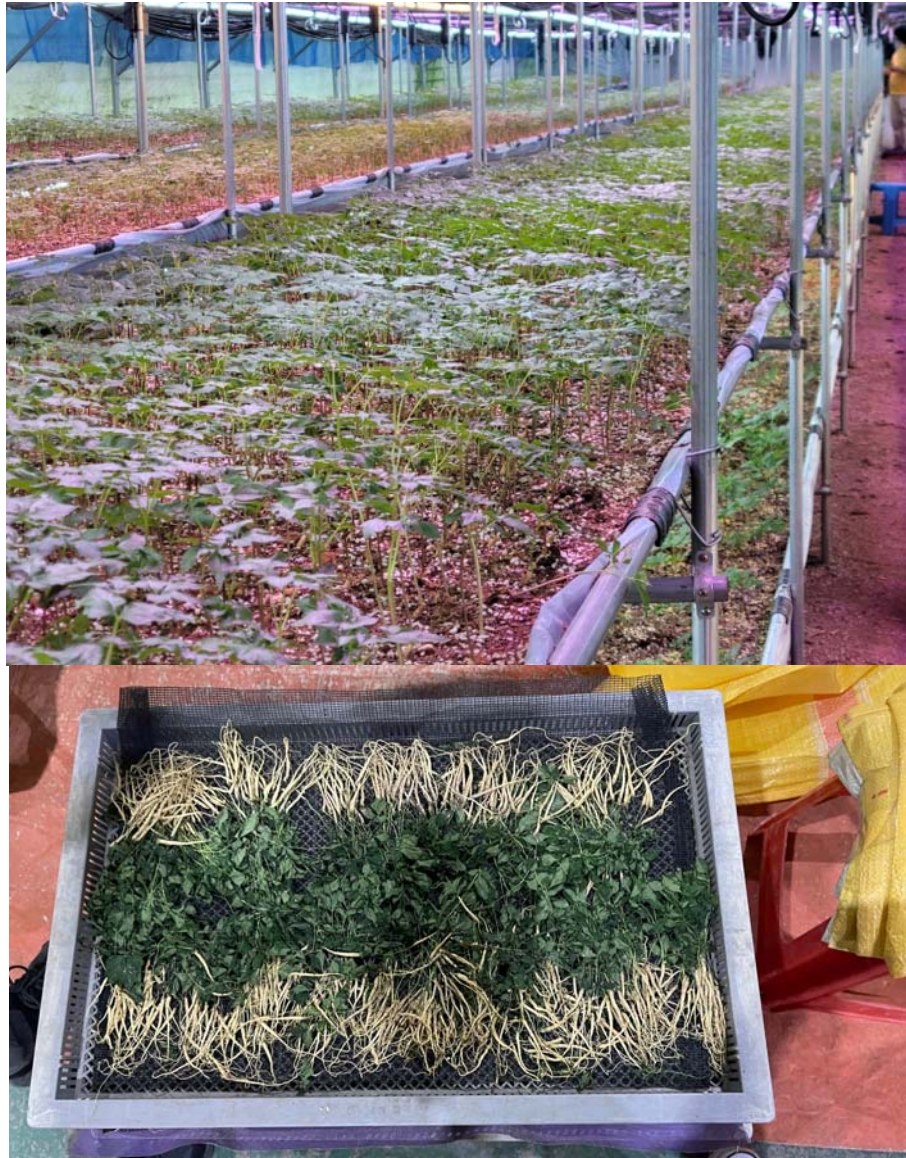

Figure S1. smart farming system and *P.ginseng* sprouts.

Supplement: s1 [file s1]
